# Supplementary material for: Fluorescence-based visualization of autophagic activity predicts mouse embryo viability
Source: PubMed Central journal article supplement — Sci Rep. 2014 Mar 31;4:4533. doi: 10.1038/srep04533 (PMC3970120; doi:10.1038/srep04533), 2014-03-31
Supplement: srep04533-s1.pdf [file srep04533-s1.pdf]

## **Supplemental Information**

**Fluorescence-based visualization of autophagic activity predicts mouse embryo viability**

**Satoshi Tsukamoto\*, Taichi Hara, Atsushi Yamamoto, Seiji Kito, Naojiro Minami,  
Toshiro Kubota, Ken Sato & Toshiaki Kokubo**

### Supplementary Figure 1

Embryos, microinjected at the 1-cell stage with GFP-LC3 mRNA, were cultured with or without BafA<sub>1</sub> until the 4-cell stage, and then observed under confocal microscopy. Massive accumulation of GFP-LC3 puncta was observed in BafA<sub>1</sub>-treated embryos. DIC, differential interference contrast. Scale bar, 10 μm.

### Supplementary Figure 2

GFP-LC3 degradation occurs in an autophagy-dependent manner.

(A) Inhibition of autophagy or lysosomal functions reduces the degradation of GFP-LC3. Embryos injected with a mixture of GFP-LC3 and control RFP mRNAs were cultured with inhibitors of either autophagy (wortmannin) or the lysosome (E64d+pepstatin A), and GFP-LC3 fluorescence was observed throughout embryo development. (B) Graph showing the total fluorescence intensities of GFP-LC3 and control RFP during embryonic development; values are expressed relative to the fluorescence at the 2-cell stage. Values are means ± s.e.m. of three different experiments, with at least 10 embryos analyzed per group. \* $P < 0.05$ ; \*\* $P < 0.01$  (Student's *t*-test). DIC, differential interference contrast. Scale bars, 100 μm.

### Supplementary Figure 3

Parameters of fertility with advancing maternal age.

(A) The number of ovulated oocytes is significantly lower in aged mice than in young mice. These females were superovulated by hormone administration. Error bars, s.e.m.; \*\* $P < 0.01$  (Student's *t*-test). (B) Fertilization rate in aged mice is comparable to that in young mice. Oocyte collected from either young or aged females were *in vitro* fertilized

with wild-type sperm, and the resultant fertilized zygotes were scored.  $P = 0.0511$  (C) Comparison of development between embryos from young and aged mothers. *In vitro* fertilized embryos were cultured and scored at the 4-cell stage (50–51 h after IVF).  $n$  represents the number of mice (A) or embryos (B, C) analyzed.

#### **Supplementary Figure 4**

Decline of lysosomal enzyme activity during maternal aging.

(A) DQ-Red BSA staining of 4-cell embryos from young or aged mothers. (B) Comparison of the number of DQ-Red BSA dots per blastomere between embryos from young and aged mothers. Numbers of embryos analyzed are shown above the bars. Error bars, s.e.m.; \* $P < 0.05$  (Student's *t*-test).

#### **Supplementary Table 1**

Comparison between autophagic activity and embryonic developmental ability (related to Figure 3).

#### **Supplementary Videos 1**

GFP-LC3 degradation in developing embryos. Embryos, microinjected with GFP-LC3 mRNA at the 1-cell stage, were cultured and imaged at 1-h intervals from the 1-cell to morula stages. The GFP-LC3 fluorescence rapidly disappeared between the 4- and 8-cell stages. (AVI; 4 MB).

#### **Supplementary Videos 2**

Inhibition of GFP-LC3 turnover in developing embryos. Embryos, microinjected with

GFP-LC3 mRNA at the 1-cell stage, were co-cultured with BafA1 and imaged at 1-h intervals from the 2-cell to morula stages. In the presence of BafA1, GFP-LC3 fluorescence remained visible even beyond the 4-cell stage. (AVI; 4 MB).

# Supplementary Fig. S1

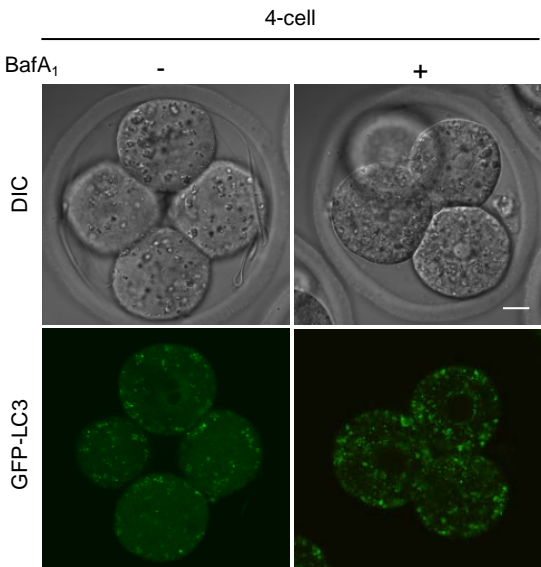

# Supplementary Fig. S2

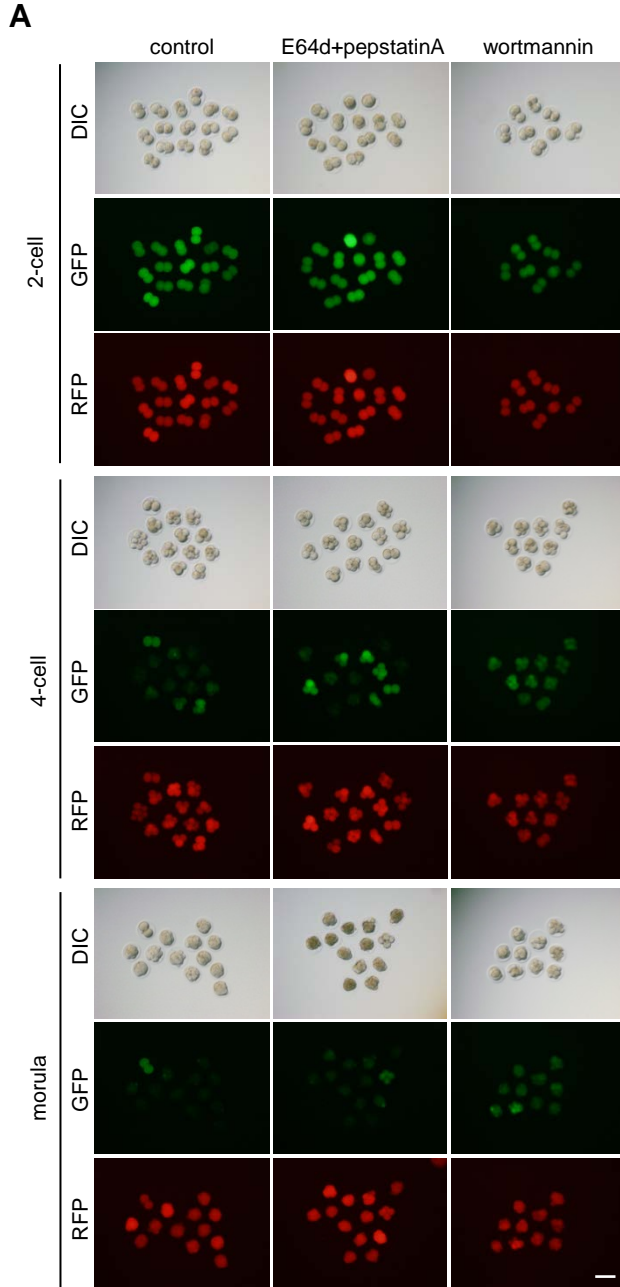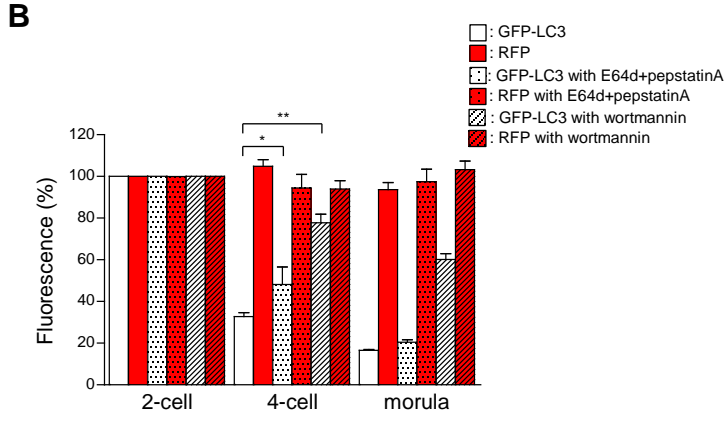

# Supplementary Fig. S3

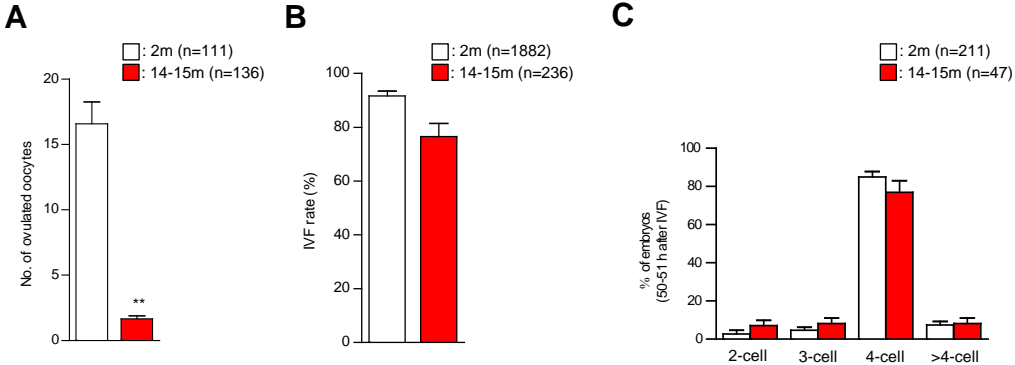

# Supplementary Fig. S4

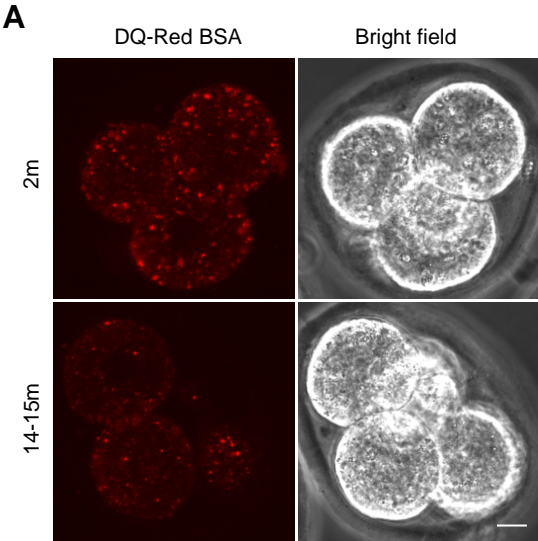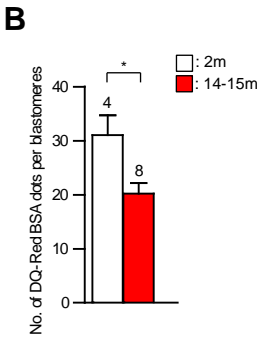



**Supplementary Table S1** | Comparison between autophagic activity and embryonic developmental ability (related to Fig. 3).

| Experimental No. | No. of embryos examined* | Fluorescence levels of GFP-LC3 | No. of embryos categorized (%) | Average of GFP-LC3 fluorescence intensity (mean $\pm$ s.d.) | Estimated embryonic developmental potential | Hatched Blastocyst (%) | No. of 4-cell embryos transferred (recipients) | No. of implantation sites (%) <sup>#</sup> | Pups (%) <sup>#</sup> |
|------------------|--------------------------|--------------------------------|--------------------------------|-------------------------------------------------------------|---------------------------------------------|------------------------|------------------------------------------------|--------------------------------------------|-----------------------|
| 1                | 9                        | Low                            | 5 (44.4)                       | 16.76 $\pm$ 2.4                                             | Good                                        | 100                    |                                                |                                            |                       |
|                  |                          | High                           | 4 (38.9)                       | 25.45 $\pm$ 1.6                                             | Poor                                        | 60                     |                                                |                                            |                       |
| 2                | 18                       | Low                            | 11 (61.1)                      | 11.51 $\pm$ 3.0                                             | Good                                        | 81.2                   |                                                |                                            |                       |
|                  |                          | High                           | 7 (38.9)                       | 25.47 $\pm$ 3.0                                             | Poor                                        | 28.6                   |                                                |                                            |                       |
| 3                | 43                       | Low                            | 27 (62.8)                      | 14.38 $\pm$ 3.5                                             | Good                                        | 77.8                   |                                                |                                            |                       |
|                  |                          | High                           | 16 (37.2)                      | 30.26 $\pm$ 4.1                                             | Poor                                        | 31.2                   |                                                |                                            |                       |
| 4                | 19                       | Low                            | 13 (68.4)                      | 9.95 $\pm$ 3.1                                              | Good                                        | 53.8                   |                                                |                                            |                       |
|                  |                          | High                           | 6 (31.6)                       | 25.55 $\pm$ 6.2                                             | Poor                                        | 33.3                   |                                                |                                            |                       |
| 5                | 66                       | Low                            | 55 (83.3)                      | 11.98 $\pm$ 3.6                                             | Good                                        | 78.2                   | 11 (1)                                         | 11 (100)                                   | 8 (72.7)              |
|                  |                          | High                           | 11 (15.2)                      | 23.49 $\pm$ 4.2                                             | Poor                                        | 45.5                   | 11 (1)                                         | 9 (81.8)                                   | 5 (45.5)              |
| 6                | 53                       | Low                            | 34 (64.2)                      | 11.9 $\pm$ 3.6                                              | Good                                        |                        | 22 (2)                                         | 21 (95.5)                                  | 14 (63.6)             |
|                  |                          | High                           | 19 (35.8)                      | 23.4 $\pm$ 4.1                                              | Poor                                        |                        | 19 (2)                                         | 12 (63.2)                                  | 7 (36.8)              |
| 7                | 56                       | Low                            | 42 (75.0)                      | 14.1 $\pm$ 2.7                                              | Good                                        |                        | 35 (3)                                         | 33 (94.3)                                  | 27 (77.1)             |
|                  |                          | High                           | 14 (25.0)                      | 24.9 $\pm$ 5.2                                              | Poor                                        |                        | 14 (1)                                         | 10 (71.4)                                  | 5 (35.7)              |

\*Only embryos that normally developed to the 4-cell stage were used in this analysis.

<sup>#</sup>The number of 4-cell embryos transferred was taken as 100% for the calculation of the percentage of the implantation sites or pups.
